# Supplementary material for: N-Acetylglucosamine Kinase, HXK1 Is Involved in Morphogenetic Transition and Metabolic Gene Expression in Candida albicans
Source: PLoS One. 2013 Jan 14;8(1):e53638. doi: 10.1371/journal.pone.0053638 (PMC3544915; doi:10.1371/journal.pone.0053638)
Supplement: Table S2 — List of significantly upregulated/downregulated genes in hxk1mutant compared to wild type in glucose grown cells. (XLS) [file pone.0053638.s005.xls]

## Sheet: Sheet1
List of significantly upregulated/downregulated genes in hxk1mutant compared to wild type in glucose grown cells
ORF Name		Systematic Name	Description	Fold change(repl.1)	Fold change(repl.2)	Fold change (Average)
Orf19.5392		NGT1	N-acetylglucosamine (GlcNAc)-specific transporter	11.13	16.39	13.76
Orf19.2157		DAC1	N-acetylglucosamine-6-phosphate (GlcNAcP) deacetylase	9.39	10.83	10.11
Orf19.2156		NAG1	Glucosamine-6-phosphate deaminase	8.16	11.8	9.98
Orf19.1066		GIG1	Protein induced by N-acetylglucosamine (GlcNAc)	2.5	3.57	3.04
Orf19.3151		PGK1	Phosphoglycerate kinase	2.03	2	2.02
Orf19.3997		ADH1	Alcohol dehydrogenase	2.3	3.14	2.72
Orf19.4618		FBA1	Putative fructose-bisphosphate aldolase	2.44	2.71	2.58
Orf19.6745		TPI1	Triose-phosphate isomerase	2.22	1.85	2.04
Orf19.3672		GAL10	UDP-glucose 4-epimerase required for galactose utilization	2.07	2.73	2.4
Orf19.7021		GPH1	Putative glycogen phosphorylase	2.44	2.17	2.31
Orf19.1288		FOX2	3-hydroxyacyl-CoA epimerase	2.17	2.63	2.4
Orf19.1789.1		LYS1	Saccharopine dehydrogenase	3.05	2.45	2.75
Orf19.183		HIS3	Imidazoleglycerol-phosphate dehydratase	2.05	2.48	2.26
Orf19.386		SAM4	Putative S-adenosylmethionine-homocysteine methyltransferase	3.16	2.98	3.07
Orf19.4506		LYS22	Putative homocitrate synthase	6.27	2.94	4.61
Orf19.4704		ARO1	Putative pentafunctional arom enzyme	2.17	1.92	2.05
Orf19.4718		TRP5	Predicted tryptophan synthase	2.08	2.33	2.21
Orf19.657		SAM2	S-adenosylmethionine synthetase	3.87	6.3	5.09
Orf19.1986		ARO2	Putative chorismate synthase	2.12	2.48	2.3
Orf19.2098		ARO8	Aromatic transaminase	2.17	2.35	2.26
Orf19.6994		BAT22	Putative branched chain amino acid aminotransferase	3.85	3.26	3.56
Orf19.923		THR1	Putative homoserine kinase	2.15	2.41	2.28
Orf19.2706		CRH11	GPI-anchored cell wall transglycosylase	2.41	2.9	2.65
Orf19.276			Plasma membrane-associated protein	3.86	5.01	4.43
Orf19.1108		HAM1	Putative deoxyribonucleoside triphosphate pyrophosphohydrolase	3.15	3.71	3.43
Orf19.5877		ATF1	Putative alcohol acetyltransferase	2.22	2.04	2.13
Orf19.1756		GPD1	Similar to S. cerevisiae glycerol-3-phosphate dehydrogenase	2.25	2.2	2.23
Orf19.406		ERG1	Squalene epoxidase	2.29	2.22	2.26
Orf19.4812			holo-[acyl-carrier-protein] synthase activity	2.08	2.13	2.11
Orf19.922		ERG11	Lanosterol 14-alpha-demethylase	2.27	2.04	2.16
Orf19.5674		PGA10/RBT8	Plasma membrane protein of heme-iron utilization	4.2	6.72	5.46
Orf19.2451		PGA45	Cell wall protein; putative GPI-anchor	3.87	3.02	3.45
Orf19.535		RBR1	Glycosylphosphatidylinositol (GPI)-anchored cell wall protein	2.57	3.35	2.96
Orf19.3374		ECE1	Hyphal-specific protein	2.05	2.3	2.17
Orf19.6899			Putative oxidoreductase	5.33	5.97	5.65
Orf19.5620			Stationary phase enriched protein	4.52	3.88	4.2
Orf19.7676		XYL2	Putative D-xylulose reductase; immunogenic in mice	3.7	1.85	2.78
Orf19.5710			Putative protein of unknown function	3.5	4.92	4.21
Orf19.4653			Transcriptionally regulated by iron	3.04	3.77	3.4
Orf19.5575			role in protein import into peroxisome matrix	3.02	3.63	3.32
Orf19.2020		HGT6	Putative high-affinity major facilitator superfamily glucose transporter	2.96	2.6	2.78
Orf19.3195		HIP1/GAP3	Similar to amino acid permeases	2.95	2.54	2.74
Orf19.3142			Ortholog of C. parapsilosis CDC317	2.76	3.85	3.31
Orf19.4612			Hap43p-repressed gene	2.75	4.92	3.84
Orf19.2988			Biofilm-induced gene	2.68	2.34	2.51
Orf19.4459			Protein similar to S. cerevisiae Ynl234wp	2.68	4.52	3.6
Orf19.737			Member of family of putative 7-transmembrane	2.46	1.95	2.21
Orf19.5905			Hap43p-induced gene; induced upon biofilm formation	2.44	1.96	2.2
Orf19.5720			Predicted membrane transporter	2.43	2.11	2.27
Orf19.334			Late-stage biofilm-induced gene	2.43	1.87	2.15
Orf19.6995			Putative fungal-specific transmembrane protein	2.35	3.19	2.77
Orf19.6073		HMX1	Heme oxygenase; acts in utilization of hemin iron	2.33	3.03	2.68
Orf19.5610		ARG3	ornithine carbamoyltransferase	2.3	1.86	2.08
Orf19.5735.3		dubious		2.26	4.21	3.24
Orf19.2283		DQD1	Putative 3-dehydroquinate dehydratase	2.25	1.98	2.11
Orf19.1516			Ortholog(s) have ubiquitin-specific protease activity	2.22	8.33	5.28
Orf19.4012		PCL5	Protein similar to S. cerevisiae Pcl5p	2.21	3.96	3.08
Orf19.1862			Possible stress protein	2.16	2.54	2.35
Orf19.6511		LIG1	tRNA ligase	2.13	1.96	2.05
Orf19.2512			Ortholog of C. parapsilosis CDC317	2.11	1.93	2.02
Orf19.1344			fluconazole-induced	2.1	2.63	2.36
Orf19.1584			Predicted membrane transporter	2.04	2.22	2.13
Orf19.3651		PGK1	Phosphoglycerate kinase, enzyme of glycolysis	2.03	2	2.02
Orf19.689		PLB1	Phospholipase B	2.01	2.17	2.09
Orf19.1223		DBF2	Essential serine/threonine protein kinase	2	2.56	2.28
Orf19.3682		CWH8	Putative dolichyl pyrophosphate (Dol-P-P) phosphatase	0.3	0.64	0.47
Orf19.4368			Has domain(s) with predicted hydrolase activity	0.3	0.53	0.42
Orf19.2599			Mitochondrial carnitine carrier protein	0.3	0.36	0.33
Orf19.2849		AQY1	Aquaporin water channel	0.3	0.24	0.27
Orf19.731			Protein similar to S. cerevisiae Emp46p	0.29	0.42	0.36
Orf19.3669		SHA3	Putative serine/threonine kinase involved in glucose transport	0.28	0.35	0.32
Orf19.6993		GAP2	General amino acid permease	0.28	0.62	0.45
Orf19.4813		GUA1	Putative GMP synthase	0.28	0.25	0.26
Orf19.4379		PRP13	Putative integral inner mitochondrial membrane protein	0.27	0.61	0.44
Orf19.5295			induced in response to alpha pheromone in SpiderM medium	0.26	0.51	0.38
Orf19.6402		CYS3	Cystathionine gamma-lyase; upregulated by alkaline	0.21	0.24	0.23
Orf19.670.2			Hap43p-repressed gene; hypoxia downregulated	0.21	0.34	0.27
Orf19.5025		MET3	ATP sulfurlyase of sulfate assimilation	0.2	0.26	0.23
Orf19.7585		INO1	Inositol-1-phosphate synthase	0.19	0.13	0.16
Orf19.2397			Predicted membrane transporter	0.17	0.26	0.22
Orf19.1691			Plasma-membrane-localized protein	0.16	0.12	0.14
Orf19.1608			Ortholog(s) have cytosol, nucleus localization	0.06	0.12	0.09
