# Supplementary material for: N-Acetylglucosamine Kinase, HXK1 Is Involved in Morphogenetic Transition and Metabolic Gene Expression in Candida albicans
Source: PLoS One. 2013 Jan 14;8(1):e53638. doi: 10.1371/journal.pone.0053638 (PMC3544915; doi:10.1371/journal.pone.0053638)
Supplement: Table S3 — Functional categorization of significantly over represented gens. (XLS) [file pone.0053638.s006.xls]

## Sheet: goFinderResult.15450
Functional categorization of significantly over represented gens
GO_term	Cluster frequency	Background frequency	P-value	False discovery rate	Gene(s) annotated to the term
small molecule biosynthetic process	14 out of 62 genes, 22.6%	228 out of 6513 background genes, 3.5%	4.71e-06	0	GPD1:LYS1:HIS3:ARO2:ARO8:SAM4:ERG1:LYS22:ARO1:TRP5:orf19.4812:SAM2:ERG11:THR1
single-organism biosynthetic process	14 out of 62 genes, 22.6%	230 out of 6513 background genes, 3.5%	5.27e-06	0	GPD1:LYS1:HIS3:ARO2:ARO8:SAM4:ERG1:LYS22:ARO1:TRP5:orf19.4812:SAM2:ERG11:THR1
carboxylic acid metabolic process	14 out of 62 genes, 22.6%	297 out of 6513 background genes, 4.6%	0.00012	0	FOX2:LYS1:HIS3:ARO2:ARO8:SAM4:ERG1:LYS22:ARO1:TRP5:orf19.4812:SAM2:BAT22:THR1
oxoacid metabolic process	14 out of 62 genes, 22.6%	297 out of 6513 background genes, 4.6%	0.00012	0	FOX2:LYS1:HIS3:ARO2:ARO8:SAM4:ERG1:LYS22:ARO1:TRP5:orf19.4812:SAM2:BAT22:THR1
organic acid metabolic process	14 out of 62 genes, 22.6%	298 out of 6513 background genes, 4.6%	0.00013	0	FOX2:LYS1:HIS3:ARO2:ARO8:SAM4:ERG1:LYS22:ARO1:TRP5:orf19.4812:SAM2:BAT22:THR1
cellular ketone metabolic process	14 out of 62 genes, 22.6%	310 out of 6513 background genes, 4.8%	0.00021	0	FOX2:LYS1:HIS3:ARO2:ARO8:SAM4:ERG1:LYS22:ARO1:TRP5:orf19.4812:SAM2:BAT22:THR1
cellular amino acid metabolic process	11 out of 62 genes, 17.7%	197 out of 6513 background genes, 3.0%	0.0005	0	LYS1:HIS3:ARO2:ARO8:SAM4:LYS22:ARO1:TRP5:SAM2:BAT22:THR1
small molecule metabolic process	19 out of 62 genes, 30.6%	623 out of 6513 background genes, 9.6%	0.0007	0	HAM1:FOX2:GPD1:LYS1:HIS3:ARO2:ARO8:orf19.276:SAM4:ERG1:LYS22:ARO1:TRP5:orf19.4812:ATF1:SAM2:BAT22:ERG11:THR1
cellular amino acid biosynthetic process	8 out of 62 genes, 12.9%	105 out of 6513 background genes, 1.6%	0.00148	0	LYS1:HIS3:ARO2:SAM4:LYS22:ARO1:TRP5:THR1
organic acid biosynthetic process	9 out of 62 genes, 14.5%	147 out of 6513 background genes, 2.3%	0.00225	0	LYS1:HIS3:ARO2:SAM4:LYS22:ARO1:TRP5:orf19.4812:THR1
carboxylic acid biosynthetic process	9 out of 62 genes, 14.5%	147 out of 6513 background genes, 2.3%	0.00225	0	LYS1:HIS3:ARO2:SAM4:LYS22:ARO1:TRP5:orf19.4812:THR1
single-organism carbohydrate catabolic process	6 out of 62 genes, 9.7%	58 out of 6513 background genes, 0.9%	0.00414	0	PGK1:GAL10:ADH1:FBA1:TPI1:GPH1
glycolysis	4 out of 62 genes, 6.5%	18 out of 6513 background genes, 0.3%	0.00534	0	PGK1:ADH1:FBA1:TPI1
carbohydrate catabolic process	6 out of 62 genes, 9.7%	61 out of 6513 background genes, 0.9%	0.00556	0	PGK1:GAL10:ADH1:FBA1:TPI1:GPH1
hexose catabolic process	5 out of 62 genes, 8.1%	37 out of 6513 background genes, 0.6%	0.00592	0	PGK1:GAL10:ADH1:FBA1:TPI1
N-acetylglucosamine metabolic process	3 out of 62 genes, 4.8%	7 out of 6513 background genes, 0.1%	0.00724	0	GIG1:NAG1:DAC1
monosaccharide catabolic process	5 out of 62 genes, 8.1%	41 out of 6513 background genes, 0.6%	0.00989	0	PGK1:GAL10:ADH1:FBA1:TPI1
aspartate family amino acid metabolic process	5 out of 62 genes, 8.1%	41 out of 6513 background genes, 0.6%	0.00989	0	LYS1:SAM4:LYS22:SAM2:THR1
positive regulation of defense response	4 out of 62 genes, 6.5%	21 out of 6513 background genes, 0.3%	0.01022	0	PGK1:ADH1:FBA1:TPI1
induction by symbiont of host defense response	4 out of 62 genes, 6.5%	21 out of 6513 background genes, 0.3%	0.01022	0	PGK1:ADH1:FBA1:TPI1
induction by organism of defense response of other organism involved in symbiotic interaction	4 out of 62 genes, 6.5%	21 out of 6513 background genes, 0.3%	0.01022	0	PGK1:ADH1:FBA1:TPI1
positive regulation by symbiont of host defense response	4 out of 62 genes, 6.5%	21 out of 6513 background genes, 0.3%	0.01022	0	PGK1:ADH1:FBA1:TPI1
positive regulation by organism of defense response of other organism involved in symbiotic interaction	4 out of 62 genes, 6.5%	21 out of 6513 background genes, 0.3%	0.01022	0	PGK1:ADH1:FBA1:TPI1
aromatic amino acid family metabolic process	4 out of 62 genes, 6.5%	23 out of 6513 background genes, 0.4%	0.01491	0	ARO2:ARO8:ARO1:TRP5
glucosamine-containing compound metabolic process	4 out of 62 genes, 6.5%	25 out of 6513 background genes, 0.4%	0.021	0	GIG1:NAG1:DAC1:CRH11
amino sugar metabolic process	4 out of 62 genes, 6.5%	25 out of 6513 background genes, 0.4%	0.021	0	GIG1:NAG1:DAC1:CRH11
modulation by symbiont of host defense response	4 out of 62 genes, 6.5%	28 out of 6513 background genes, 0.4%	0.03327	0.0104	PGK1:ADH1:FBA1:TPI1
modulation by organism of defense response of other organism involved in symbiotic interaction	4 out of 62 genes, 6.5%	28 out of 6513 background genes, 0.4%	0.03327	0.01	PGK1:ADH1:FBA1:TPI1
carbohydrate metabolic process	10 out of 62 genes, 16.1%	256 out of 6513 background genes, 3.9%	0.03377	0.0097	FOX2:GPD1:NAG1:CRH11:PGK1:GAL10:ADH1:FBA1:TPI1:GPH1
hexose metabolic process	5 out of 62 genes, 8.1%	54 out of 6513 background genes, 0.8%	0.03799	0.0093	PGK1:GAL10:ADH1:FBA1:TPI1
regulation of defense response	4 out of 62 genes, 6.5%	29 out of 6513 background genes, 0.4%	0.03832	0.0097	PGK1:ADH1:FBA1:TPI1
modification of morphology or physiology of other organism	4 out of 62 genes, 6.5%	30 out of 6513 background genes, 0.5%	0.0439	0.0106	PGK1:ADH1:FBA1:TPI1
modification by symbiont of host morphology or physiology	4 out of 62 genes, 6.5%	30 out of 6513 background genes, 0.5%	0.0439	0.0103	PGK1:ADH1:FBA1:TPI1
modification of morphology or physiology of other organism involved in symbiotic interaction	4 out of 62 genes, 6.5%	30 out of 6513 background genes, 0.5%	0.0439	0.01	PGK1:ADH1:FBA1:TPI1
glucose catabolic process	4 out of 62 genes, 6.5%	30 out of 6513 background genes, 0.5%	0.0439	0.0097	PGK1:ADH1:FBA1:TPI1
Note: GO term analysis was performed for the differentially up-regulated genes given in Table S2. FDR < 1% and at the same time overrepresented genes with p-values less < 0.05 have been consider
